# Supplementary material
Source: Springer Nature journal article supplement (https://www.springermedizin.de/resource/supplementary/12889_2010_2502_MOESM1_ESM.pdf/9486182)

Admissions

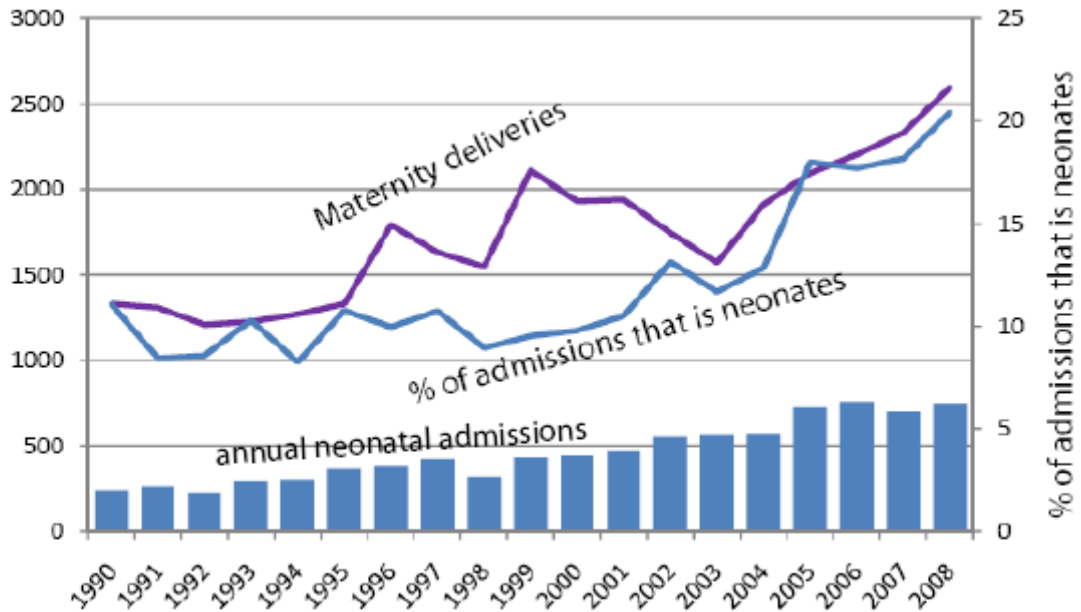

Supplement: MOESM1 [file 9486182]
